# Supplementary material for: Identification, gene expression and genetic polymorphism of zinc finger A20/AN1 stress-associated genes, HvSAP, in salt stressed barley from Kazakhstan
Source: PubMed Central journal article supplement (PMC7556924; doi:10.1186/s12870-020-02332-4), 2020-10-14
Supplement: 12870_2020_2332_MOESM1_ESM.pdf [file 12870_2020_2332_MOESM1_ESM.pdf]

## Additional file 1

Baidyussen A. et al. Identification, gene expression and genetic polymorphism of Zinc finger A20/AN1 stress-associated genes, *HvSAP1*, in salt stressed barley from Kazakhstan

**Figure S1. Fragments of sequences in 3'-UTR region of *HvSAP12* gene in two barley parents, Granal and Baisheshek. Positions of the identified SNP is indicated on the top by arrows.**

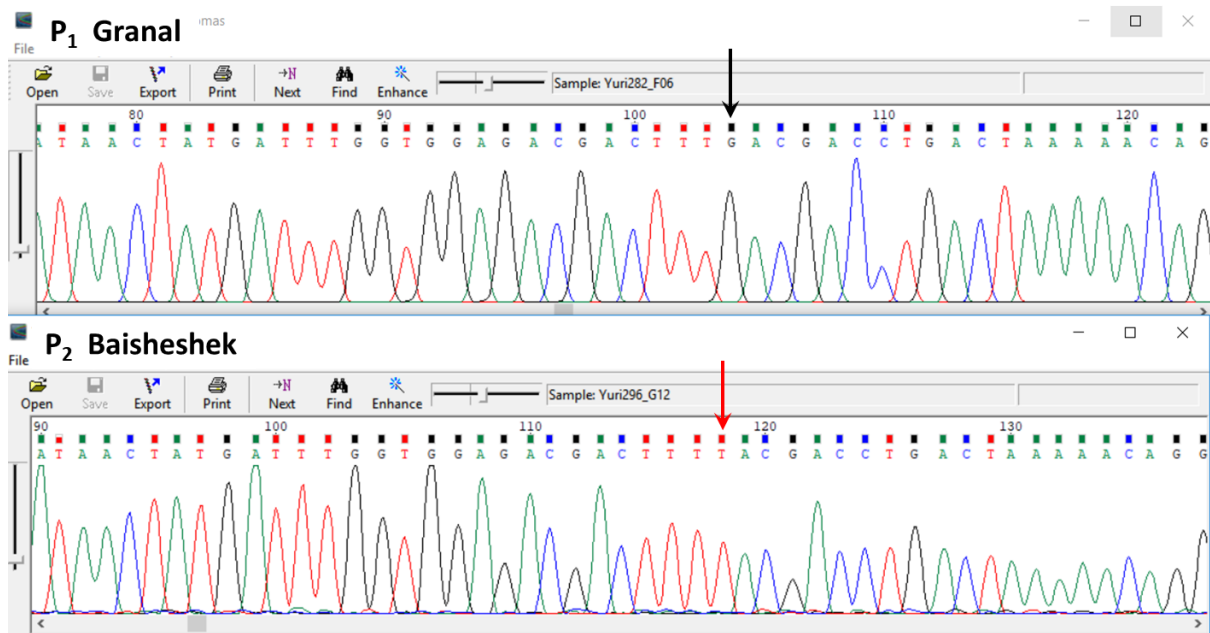

**Figure S2. Position of SNP, primer design, sequences of the Universal probes and SNP-specific primers, and size of amplicons.**

CTCATTTCAGCAAACACTAGCCGTGATAGAGGAAGAGTCCCGATATTTCAATGAGATGATAAC  
TATGATTTGGTGGAGACGACTTTKACGACCTGACTAAAAACAGGAATGATGTGAAGCCTTAG  
CAATCGTCAAA CCAACTCCAAGTGGTTATTGACCACGCCGGAGTACGATCAACCTGACCACG  
AAGGTCTCTTCTGCAAGCAGTCAAAGAACAACAATAGTATGATAAAGCAATCTGAATATT

**KATU-B30-SNP-F7:** GAAGGTGACCAAGTTCATGCTGATTTGGTGGAGACGACTTTG  
(Granal allele)

**KATU-B30-SNP-F8:** GAAGGTCGGAGTCAACGGATTATGATTTGGTGGAGACGACTTTT  
(Baisheshek allele)

**KATU-B30-SNP-R2:** GTCAATAACCACTTGGAGTTGG

Amplicon size = 93 bp

**Sequence of two Universal probes**

**Universal probe 1:**

5' -FAM-AGCGATGCGTTCGAGCATCGC (T\*-BHQ1) GAAGGTGACCAAGTTCATGCT-3'

**Universal probe 2:**

5' -HEX-AGGACGCTGAGATGCGTCC (T\*-BHQ1) GAAGGTCGGAGTCAACGGATT-3'

**Table S1. Primers used for semi-quantitative RT-PCR and qPCR analysis of 17 *HvSAP* genes and two Reference genes including amplicon sizes and oligonucleotide sequences.**

The last two genes *HvSAP17* and *HvSAP17a* have common primers due to insufficient differences in the gene sequences. Five genes highlighted in yellow showed high expression in the semi-quantitative RT-PCR and were selected for further qPCR. The information about two Reference genes was taken from Ferdous et al., 2015 [32].

| Entry | Name of gene/primer | Amplicon (bp) | F / R | Sequence (5' - 3')       |
|-------|---------------------|---------------|-------|--------------------------|
| 1     | HvSAP1-qPCR         | 146           | F     | GCGAAGCCGGCGAGGACG       |
|       |                     |               | R     | GCCTTGTAGTCGTAGCTGCACC   |
| 2     | HvSAP2-qPCR         | 156           | F     | CAAGTGCTTCCGCGACAGCCT    |
|       |                     |               | R     | CCCATCAGGCCACCTTCC       |
| 3     | HvSAP3-qPCR         | 160           | F     | GACACCCGAGAAGACGAAGGC    |
|       |                     |               | R     | GCCTTGTAGTCGAAGAAGCAGGT  |
| 4     | HvSAP4-qPCR         | 235           | F     | AAGGAGATGGTCATGAAGGAGGAA |
|       |                     |               | R     | CGATTCCGGCCCCTCCTTCT     |
| 5     | HvSAP5-qPCR         | 136           | F     | CCTCCTCTTTTGACAGCATCGTC  |
|       |                     |               | R     | GGACCAGCGATGTCAGCAGG     |
| 6     | HvSAP6-qPCR         | 165           | F     | GTGGCAGAGATGAAGGATGAAGC  |
|       |                     |               | R     | GTGCATCGAGCAGAAGGTGTCT   |
| 7     | HvSAP7-qPCR         | 206           | F     | CAGCTGACCCCGCCGTGA       |
|       |                     |               | R     | GACGGGGTTGTGCTTGGCTATT   |
| 8     | HvSAP9-qPCR         | 219           | F     | GCTGCAGCTGGTGCTGATGCT    |
|       |                     |               | R     | AAGAGGGTTCTGCTGCGCCATCA  |
| 9     | HvSAP9a-qPCR        | 205           | F     | TGCGGCGGCCTGCGTCGA       |
|       |                     |               | R     | CAGAGTCCTGCAGGCTCAGC     |
| 10    | HvSAP10-qPCR        | 156           | F     | CACCACCGGCAACATGTGCTCT   |
|       |                     |               | R     | CACGCACCGGCTCGCCCT       |
| 11    | HvSAP11-qPCR        | 163           | F     | CGTTCCCGCTCTTCGACAAGC    |
|       |                     |               | R     | AACCCCGTCAGGCCACG        |
| 12    | HvSAP12-qPCR        | 139           | F     | CAAAGCCGCCAGCAACCGA      |
|       |                     |               | R     | GCCTTCTTGTAGTCGAATGAGCAT |
| 13    | HvSAP14-qPCR        | 137           | F     | TGGGGCTGCTGGGGTTCCT      |
|       |                     |               | R     | GATCACGATGGGGTTGTGCTTGA  |
| 14    | HvSAP15-qPCR        | 160           | F     | CATTGTCGTCTGTGCTGTTTCGTT |
|       |                     |               | R     | TCCTCCCGACCCACAGTTTTATAA |
| 15    | HvSAP16-qPCR        | 208           | F     | AGTTCCTGGGTGCAGAGAAGCA   |
|       |                     |               | R     | GGAAGAACTACTGCTACTGCTGTT |
| 16    | HvSAP17/17a-qPCR    | 130           | F     | ACAAGACGGACGCGGAGATC     |
|       |                     |               | R     | TGGCTGGTGTGGAGAAGGTGA    |
| 17    | HvADP               | 77            | F     | GCTCTCCAACAACATTGCCAAC   |
|       |                     |               | R     | GAGACATCCAGCATCATTATTCC  |
| 18    | HvGAPDH             | 78            | F     | GCCAAGACCCAGTAGAGC       |
|       |                     |               | R     | CACATTTATTCCCATAGACAAAGG |
